# $\beta$ -arrestin control of late endosomal sorting facilitates decoy receptor function and chemokine gradient formation

Harsha Mahabaleshwar<sup>1,\*</sup>, Katsiaryna Tarbashevich<sup>1,\*</sup>, Matthias Nowak<sup>2</sup>, Michael Brand<sup>2</sup> and Erez Raz<sup>1,†</sup>

## SUMMARY

A crucial regulator of Cxcl12 is the decoy receptor Cxcr7, which controls the level of the chemokine in the tissue. The molecular mechanisms that enable Cxcr7 to function as an efficient molecular sink are not known. Using zebrafish primordial germ cells as a model, we identify a novel role for  $\beta$ -arrestins in controlling the intracellular trafficking of Cxcr7.  $\beta$ -arrestins facilitate the recycling of Cxcr7 from late endosomal compartments back to the plasma membrane, whereas the internalized ligand undergoes lysosomal degradation.  $\beta$ -arrestins thus function in regulating chemokine gradient formation, allowing responding cells to discriminate between alternative migration targets in vivo.

**KEY WORDS:** Primordial germ cells (PGCs),  $\beta$ -arrestin, Chemokine gradient, Chemotaxis

## INTRODUCTION

The chemokine receptor Cxcr7 has been shown to bind Cxcl12 in vitro (Balabanian et al., 2005; Burns et al., 2006). Cxcr7 function is important for heart development (Sierro et al., 2007), interneuron migration (Sánchez-Alcañiz et al., 2011; Wang et al., 2011), leukocyte trafficking (Cruz-Orengo et al., 2011) and for promoting breast and lung tumorigenesis (Miao et al., 2007; Luker et al., 2012). Some of these in vivo studies, as well as those conducted in vitro (Luker et al., 2010; Naumann et al., 2010), are consistent with the idea that Cxcr7 serves as a receptor that effectively scavenges Cxcl12a and does not influence downstream signaling pathways (reviewed by Mantovani et al., 2006). Despite its importance in controlling Cxcl12 activity in the tissue, the molecular mechanisms promoting the decoy function of Cxcr7 are unknown. A useful in vivo model for exploring this issue is the migration of primordial germ cells (PGCs) (Boldajipour et al., 2008) in zebrafish.

Here we demonstrate that the efficiency of Cxcr7b as a molecular sink relies on a novel role for  $\beta$ -arrestins, molecules previously suggested to be important for downstream signaling of the receptor (Rajagopal et al., 2010). Specifically, we show that the internalized Cxcr7b-Cxcl12 complex is targeted to late endosomes, where, in a  $\beta$ -arrestin-dependent manner, the ligand and the receptor separate, such that the chemokine is degraded whereas the receptor is recycled. Disrupting the function of  $\beta$ -arrestins in this context interferes with Cxcr7b function in shaping the chemokine gradient, leading to defects in the migration of germ cells towards their correct target.

## MATERIALS AND METHODS

### Zebrafish strains

Fish of the AB background and those carrying the *Tol-kop-EGFP-F-nos1-3'UTR* (Blaser et al., 2006) or the *gsc-GFP* transgene were used.

<sup>1</sup>Institute of Cell Biology, ZMBE, University of Münster, Von-Esmarch-Str. 56, 48149 Münster, Germany. <sup>2</sup>Developmental Genetics, Biotechnology Center, TUD, Tatzberg 47-49, 01307 Dresden, Germany.

\*These authors contributed equally to this work

†Author for correspondence (erez.raz@uni-muenster.de)

### Western blotting

Protein extracts from 8-hpf zebrafish embryos were subjected to standard western blotting analysis using primary antibodies against pErk1/2, Erk1/2 (Cell Signaling) and  $\alpha$ -tubulin (Acris) at 1:1000 dilution.

### Cloning and RT-PCR of zebrafish $\beta$ -arrestins

Primers used for cloning and RT-PCR of zebrafish *arrdc1*, *arrb2a* and *arrb2b* (NM\_001159822, NM\_214681 and NM\_201124) are listed in supplementary material Table S1.

### Microinjection into zebrafish embryos

RNA and/or morpholino antisense oligonucleotides (MOs) were microinjected into the yolk of 1-cell stage zebrafish embryos, or into one blastomere at the 8- or 16-cell stage. The RNA expression constructs and MOs used are listed in supplementary material Table S1.

The specificity and efficiency of MOs targeting *arrb2a* and *arrb2b* were validated by blocking the translation of mRNAs encoding EGFP-tagged reporters (supplementary material Fig. S11A,B).

### In situ hybridization

Whole-mount in situ hybridization was performed as previously described (Weidinger et al., 1999).

### Image acquisition and analysis

Time-lapse imaging was performed on an AxioImager.M1 microscope (Zeiss) with a dual-view filter (MAG Biosystems), Cascade II and CoolSNAP ES2 cameras (Photometrics) and VS laser control. Confocal images were acquired on an LSM 710 microscope (Zeiss). Images were processed using Imaris (Bitplane), MetaMorph (Molecular Devices) and ImageJ (NIH) software. The ZEN colocalization coefficient module (Zeiss) was used for quantifying the colocalization between the Cxcr7b signal and that of endosomal markers.

## RESULTS AND DISCUSSION

### Partial overlap between *cxcr7b* and $\beta$ -arrestin expression

$\beta$ -arrestins were originally shown to desensitize activated G protein-coupled receptors and to promote receptor endocytosis (Laporte et al., 1999; Laporte et al., 2000). By facilitating receptor internalization,  $\beta$ -arrestins allow adaptation to a persistent stimulus, thus effectively reducing the signaling level (Benovic et al., 1987).  $\beta$ -arrestins were also shown to be important for internalization and ligand-dependent depletion of Cxcr7 from the cell membrane

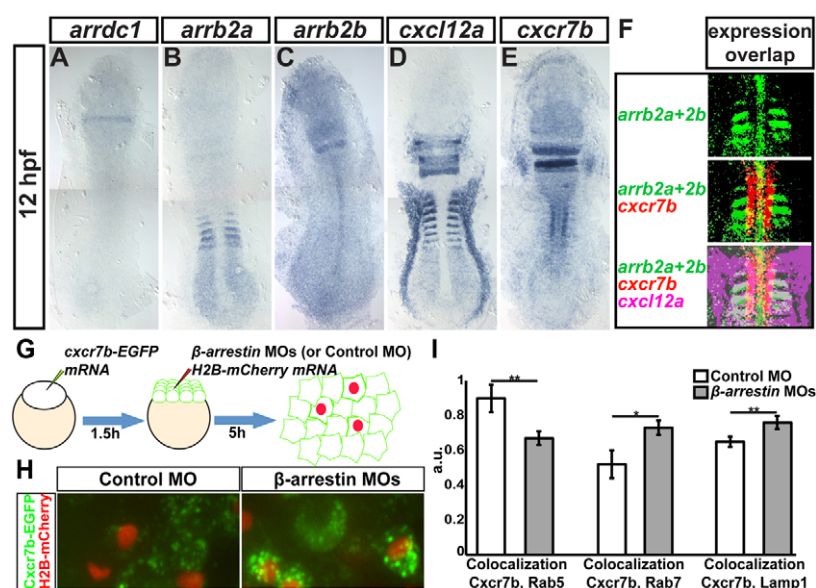

**Fig. 1. Expression patterns of  $\beta$ -arrestin genes, *cxcl12a* and *cxcr7b* and control of *Cxcr7b* localization by  $\beta$ -arrestins.** (A–E) Expression pattern of *arrdc1* (A), *arrb2a* (B), *arrb2b* (C), *cxcl12a* (D) and *cxcr7b* (E) in 12-hpf zebrafish embryos. (F) Partial overlap of *arrb1a*, *arrb2b*, *cxcr7b* and *cxcl12a* expression patterns in the anterior somites, freeing lateral *Cxcl12a* expression domains (magenta) from *Cxcr7* and  $\beta$ -arrestin effects. (G) The procedure for generating uniform *Cxcr7b*-EGFP expression (green) and cell clones knocked down for  $\beta$ -arrestins by injection with MOs targeting all  $\beta$ -arrestins (or control MO) and Histone H2B-mCherry for clone labeling (red). (H) In control 7-hpf mosaic embryo (left), *Cxcr7b* is found in small vesicles. In cells compromised for  $\beta$ -arrestin function (red nuclei, right), *Cxcr7b* vesicles are often enlarged. (I) Average colocalization coefficient (see supplementary material Fig. S12) among *Cxcr7b*-EGFP and Rab7-mCherry (at 5 hpf), Lamp1-DsRedmonomer and Rab5-mCherry (at 8 hpf) in control and  $\beta$ -arrestin knockdown cells. Data were averaged among six measurements (one image per embryo, ~80 cells in the field of view). \* $P < 0.05$ , \*\* $P < 0.01$ , Student's *t*-test. Error bars indicate s.e.m.

(Luker et al., 2010) and for increased uptake of *Cxcl12* by cells expressing the receptor (Luker et al., 2009). Nevertheless, the actual mechanism by which  $\beta$ -arrestins facilitate the function of *Cxcr7* is unknown.

To determine the role that  $\beta$ -arrestins play in the context of *Cxcr7b* function in embryogenesis, we examined their function in germ cell migration. We first monitored the RNA expression pattern of the zebrafish  $\beta$ -arrestin homologs  $\beta$ -arrestin 1,  $\beta$ -arrestin 2a and  $\beta$ -arrestin 2b (*arrdc1*, *arrb2a* and *arrb2b*). We found that, similar to the *cxcr7b* expression pattern, these RNAs are initially ubiquitously expressed and become restricted to specific tissues at later stages of development (Fig. 1A–C,E,F; supplementary material Fig. S1).

### $\beta$ -arrestins control the endosomal sorting of *Cxcr7b*

We subsequently examined whether  $\beta$ -arrestins are involved in controlling the subcellular localization of *Cxcr7b*. We expressed an EGFP-tagged version of *Cxcr7b* in all cells of the embryo and generated cell clones in which  $\beta$ -arrestins were knocked down using morpholino antisense oligonucleotides (MOs) (Fig. 1G, cells with red nuclei). Unexpectedly, the level of the receptor on the cell membrane was not increased in  $\beta$ -arrestin knockdown cells (supplementary material Fig. S2), suggesting that receptor internalization is not inhibited under these conditions. Strikingly, the intracellular distribution of *Cxcr7b* was altered in cells knocked down for  $\beta$ -arrestin. Specifically, in manipulated cells, *Cxcr7b* protein accumulated in less dynamic intracellular structures that, in some cases, were significantly larger than in control cells (Fig. 1H; Fig. 2A,B; supplementary material Fig. S3 and Movies 1, 2). Thus, whereas *Cxcr7b* internalization per se does not depend on  $\beta$ -arrestins in this case, endosomal sorting of the internalized receptor is strongly affected. Interestingly, this role differs from that shown in the context of other receptors, which require  $\beta$ -arrestin for internalization (e.g. Ferguson et al., 1996; Goodman et al., 1996; Galliera et al., 2004), as well as in the case of *Cxcr7*, the internalization of which in vitro appears to be correlated with interaction with  $\beta$ -arrestin (Ray et al., 2012).  $\beta$ -arrestins can thus function in different phases of receptor trafficking depending on the receptor and the context.

To determine the basis for the abnormal distribution of *Cxcr7b* in cells knocked down for  $\beta$ -arrestin function, we monitored the localization of the receptor with respect to that of specific endocytic compartments (Huotari and Helenius, 2011). We monitored the subcellular localization of *Cxcr7b*-EGFP fusion protein relative to that of mCherry fused to Rab5, which labels early and recycling endosomes (Gorvel et al., 1991), Rab11, which is found in recycling endosomes (Ullrich et al., 1996), or Rab7, a late endosomal marker (Gorvel et al., 1991; Méresse et al., 1995), or relative to Lamp1-DsRedmonomer fusion protein, which is localized to late endosomes and lysosomes (Rohrer et al., 1996). Consistent with its suggested role as a molecular sink recycling between the membrane and intracellular compartments (Weber et al., 2004; Mantovani et al., 2006), we could identify *Cxcr7b* in Rab5-positive vesicles at stages when PGCs migrate (Fig. 1I). Interestingly, whereas  $\beta$ -arrestin knockdown did not change the distribution of *Cxcr7b* in Rab11 endosomes (supplementary material Fig. S4A), it reduced the proportion of Rab5 vesicles containing *Cxcr7b* (Fig. 1I), suggesting that  $\beta$ -arrestins regulate the level of *Cxcr7b* in early endosomes. Indeed, the opposite tendency was observed when monitoring the colocalization of *Cxcr7b* with Rab7- and Lamp1-marked vesicles, which increased in the absence of  $\beta$ -arrestins (Fig. 1I; supplementary material Fig. S5). Conducting the same measurements on a smaller microscopic field, the enhanced colocalization of *Cxcr7b* with Lamp1 vesicles in the absence of  $\beta$ -arrestin function was also observed (supplementary material Fig. S4B). These data suggest that  $\beta$ -arrestins increase the level of *Cxcr7b* in recycling compartments, thereby elevating its efficiency as a *Cxcl12a* sink. In the absence of  $\beta$ -arrestins, a higher proportion of the receptor is targeted to, and retained in, non-recycling endosomal compartments, interfering with efficient ligand uptake.

To confirm these statistical findings and observe the dynamics of *Cxcr7b* trafficking in wild-type and  $\beta$ -arrestin-deficient cells, we followed *Cxcr7b*-EGFP-containing vesicles in cells co-expressing the Lamp1-dsRedmonomer protein. In control cells, the *Cxcr7b*- and Lamp1-labeled foci showed fusion and splitting events (Fig. 2A; supplementary material Movie 1), consistent with the idea that *Cxcr7b* can exit from the late endosomal

compartment and recycle to the membrane. By contrast, in cells depleted of β-arrestins, the Cxcr7b- and Lamp1-labeled foci showed reduced dynamics (Fig. 2B; supplementary material Movie 2). Specifically, in the absence of β-arrestins, Cxcr7b-labeled foci fused with Lamp1-positive vesicles at a normal rate but separated less frequently from this compartment, resulting in fewer vesicles of increased size (Fig. 2B; supplementary material Fig. S3, Fig. S6A and Movie 2).

To observe the fate of internalized Cxcl12a with respect to its receptor, we transplanted cells expressing Cxcr7b-DsRed into embryos expressing Cxcl12a-EGFP. Interestingly, the EGFP signal was rapidly reduced following internalization, suggesting ligand degradation, whereas the signal of the receptor appeared stable (Fig. 2C; supplementary material Fig. S6B and Movie 3). The apparent degradation of Cxcl12a depends on Cxcr7b, which targets it to late endosomal compartments, as internalized ligand not in association with the decoy receptor appeared stable at the same time (supplementary material Movie 4). Notably, in cells knocked down for β-arrestin function, Cxcr7b that was trapped in the lysosomes was also subject to degradation (supplementary material Fig. S7), a possible contributing factor to the reduced level of recycled receptor on the cell membrane in this case (supplementary material Fig. S2).

Together, these observations are consistent with the idea that β-arrestins facilitate efficient chemokine scavenging activity of Cxcr7b by promoting its proper endosomal sorting (Fig. 2D). Consistent with the notion that β-arrestins function in receptor trafficking rather than actual signaling, we found that Erk1/2 (Mapk3/1 – Zebrafish Information Network) protein level and activation (phosphorylation, pErk1/2) are unaffected by Cxcr7b knockdown or overexpression (supplementary material Fig. S8). These results are consistent with the idea that, at the relevant stages of embryonic development, Cxcr7b does not activate MAPK signaling pathways, lending further support to the notion that the receptor functions as a decoy that regulates zebrafish PGC migration through signaling-independent mechanisms.

It is important to note that whereas β-arrestin knockdown affected the subcellular localization and presumably the function of Cxcr7b, we did not observe any effect on the distribution of the other Cxcl12a receptor Cxcr4b (supplementary material Fig. S9A,C,D).

### β-arrestins control the efficiency of Cxcr7b as a decoy receptor and the distribution of Cxcl12 in the tissue

We next sought to determine whether the alterations in the subcellular distribution of Cxcr7b are relevant for Cxcl12 distribution and the directed migration of PGCs. We followed the position of the PGCs in response to manipulations of β-arrestin function. Cellular domains in which β-arrestins were knocked down were generated in embryos expressing uniform levels of Cxcr7b and Cxcl12a (Fig. 3A). Notably, we observed a strong bias of PGC localization to domains depleted of β-arrestins (Fig. 3A,B). In the absence of Cxcl12a, or of Cxcr7b, the apparent attractive activity of β-arrestin-depleted domains was abolished (Fig. 3A), supporting the idea that β-arrestin function is required for controlling Cxcl12a distribution in the tissue by promoting the sink activity of Cxcr7b.

To test this notion, we monitored the effect that β-arrestins have on the distribution of fluorescently tagged Cxcl12a *in vivo*. In these experiments, we uniformly expressed Cxcr7b and Cxcl12a-Venus in embryos lacking endogenous Cxcl12a. In such embryos, we generated mCherry-labeled cellular domains

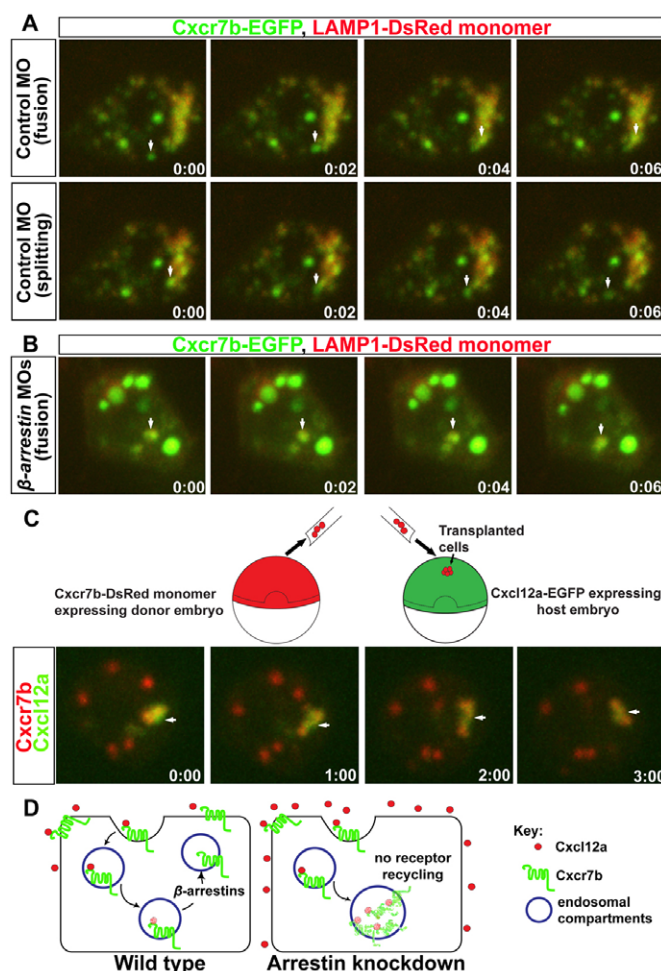

**Fig. 2. β-arrestins influence trafficking of Cxcr7b into and out of Lamp1-positive endosomes.** (A) Snapshots from supplementary material Movie 1 (example 1) showing that a Cxcr7-EGFP-labeled vesicle enters (arrow, upper panels) and splits from (arrow, lower panels) the Lamp1-DsRedmonomer-labeled endosomes in control cells. Time stamps indicate minutes:seconds. First frame corresponds to 1:33 (upper left) and 2:36 (lower left) in supplementary material Movie 1. (B) In cells lacking β-arrestin, Cxcr7-EGFP-labeled vesicles fuse with Lamp1-DsRedmonomer vesicles. First time point corresponds to 2:54 in supplementary material Movie 2. Arrow marks the vesicle of interest. (C) Illustration of a transplantation experiment. Images illustrate decay of the Cxcl12a-EGFP signal, relative to that of the receptor (supplementary material Movie 3). Arrow points at the vesicle of interest. (D) Representation of the internalization and subsequent recycling of Cxcr7b to the cell membrane after targeting Cxcl12a to degradation (left). In the absence of β-arrestin, Cxcr7b accumulates in late endosomes, compromising sink function (right).

knocked down for β-arrestins (Fig. 3C). Strikingly, in contrast to the uniform Cxcl12a-Venus signal in control embryos (Fig. 3C, Control MO panels; Fig. 3D, upper panel), domains depleted of β-arrestins showed higher levels of the chemokine (Fig. 3C, β-arrestin MO panels; Fig. 3D, lower panel). This function of β-arrestins depended on Cxcr7b activity, as knocking down the receptor abolished the effect on Cxcl12a distribution (supplementary material Fig. S10). Together, these findings suggest that β-arrestins can control the chemokine level in the tissue by affecting the endosomal sorting of Cxcr7b.



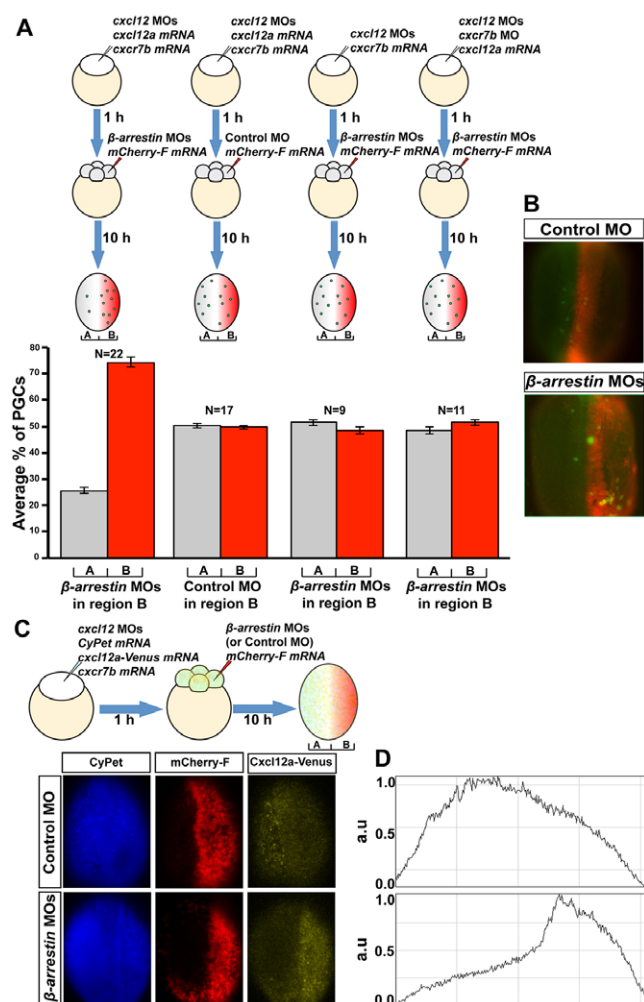

**Fig. 3.  $\beta$ -arrestins control the level of Cxcl12a in the tissue and can direct PGC migration.** (A) In embryos depleted for endogenous Cxcl12a and provided with uniform Cxcl12a (injection of MO-resistant *cxc12a* mRNA), germ cells accumulate in regions depleted of  $\beta$ -arrestin (red). Such primordial germ cell (PGC) localization is not observed in clones in which  $\beta$ -arrestin was not affected and depends on Cxcl12a and Cxcr7b function. The percentage of PGCs located in each domain in 11-hpf embryos was determined and an average among the embryos (N) for each treatment was calculated. Error bars indicate s.e.m. A significant difference ( $P < 0.001$ , Student's *t*-test) was observed for the experiment shown on the left. (B) A typical result for the experiments shown in A, in which  $\beta$ -arrestin activity is similar in regions A and B (control MO) or is knocked down in region B ( $\beta$ -arrestin MOs). (C) Generation of clones depleted of  $\beta$ -arrestin (or control clones) in embryos uniformly expressing CyPet (a cyan fluorescent protein derivative), Cxcr7b and Cxcl12a-Venus. (D) Intensity profiles of Cxcl12a-Venus in control chimera (top) and  $\beta$ -arrestin morphant chimera (bottom) measured from the embryos presented in C at 11 hpf. a.u., arbitrary units.

### $\beta$ -arrestins control the discrimination between alternative migration targets

PGCs follow the dynamics of Cxcl12a expression in the embryo. During early somitogenesis stages, *cxc12a* RNA is expressed along the lateral plate mesoderm, which includes the site where the gonad develops, and in the forming somites (Doitsidou et al., 2002) (Fig. 4C). Whereas both expression domains are inherently attractive for PGCs, the cells prefer the relevant lateral *cxc12a* expression domain, while 'ignoring' the other.

To examine the role that  $\beta$ -arrestins play in the physiological context of the developing embryo, we examined their involvement in facilitating PGC migration away from the developing somites. Comparing the expression patterns of *arrb2a* and *arrb2b* with that of *cxc12a* and *cxc7b* at 12 hours postfertilization (hpf) revealed significant overlap of *arrb2a*, *cxc7b* and *cxc12a* in the forming somites and of *cxc7b* and *arrb2b* close to and within the midline (Fig. 1B-F), both of which represent regions of the embryo that PGCs vacate (Weidinger et al., 1999). These findings raise the possibility that the level of Cxcl12a protein produced in the developing somites or diffusing to the midline is reduced at these locations by the action of Cxcr7b and the relevant  $\beta$ -arrestins. This scenario could account for the observed migration of PGCs that were born within the somite-forming region towards lateral locations of Cxcl12a expression, thereby approaching the site of the developing gonad (Fig. 4A; supplementary material Movie 5).

To test this possibility, we compared the number of PGCs located within the somites in embryos knocked down for a given  $\beta$ -arrestin versus a combination of the three. Indeed, embryos in which all  $\beta$ -arrestins are knocked down show, on average, 4.61 cells at forming somites as compared with 0.51 in control embryos (Fig. 4C). Using time-lapse microscopy to monitor the behavior of the PGCs, we find that the ectopic cells that did not vacate the somatic mesoderm in  $\beta$ -arrestin morphants showed a cellular phenotype reminiscent of that observed in embryos depleted for Cxcr7b function. Specifically, these cells fail to polarize or migrate (Fig. 4B; supplementary material Movie 6) (Boldajipour et al., 2008), consistent with the idea that they encounter high levels of Cxcl12a at this location.

The cellular phenotype observed in embryos knocked down for  $\beta$ -arrestins differs from that associated with defects involving the guidance receptor Cxcr4b, where motility per se is unaffected (Doitsidou et al., 2002). To further exclude a role for Cxcr4b in the evolution of the  $\beta$ -arrestin-dependent phenotype, we monitored the position of PGCs guided by a receptor mutated such that it cannot internalize (Minina et al., 2007). The ability of these PGCs to clear the somites and migrate laterally also depended on the function of  $\beta$ -arrestins (supplementary material Fig. S9B), showing that this migration step is independent of Cxcr4b internalization. Together, these results assign a novel role for  $\beta$ -arrestins in the modulation of Cxcl12a distribution in the tissue, ensuring proper target choice by PGCs (Fig. 4D).

The choice between conflicting chemotactic cues is a recurring theme in development and homeostasis. For instance, a migrating macrophage might have to direct its response in a field of cues that includes attraction signals originating from a wound, developmental guidance cues and signals emanating from apoptotic cells (Moreira et al., 2010). The potency of each of these competing signals depends, at least in part, on the absolute available level of the attractant. One of the mechanisms underlying the regulation of protein levels in discrete domains could involve molecules acting as sinks. Such a mechanism is exemplified in the context of PGC migration; the magnitude of attraction by Cxcl12a is regulated by  $\beta$ -arrestins by way of reducing the level of the chemokine in the somites, allowing the PGCs to vacate 'irrelevant locations' in response to a higher concentration of Cxcl12a at the region where the gonads develop.

We note, however, a difference between the phenotype induced upon Cxcr7b knockdown, where cells exhibit very early migration defects due to very high levels of Cxcl12a in the environment (Boldajipour et al., 2008), and the relatively mild phenotype observed upon knocking down  $\beta$ -arrestins, where the germ cells arrive in the vicinity of the forming gonad (Fig. 4B,C). The

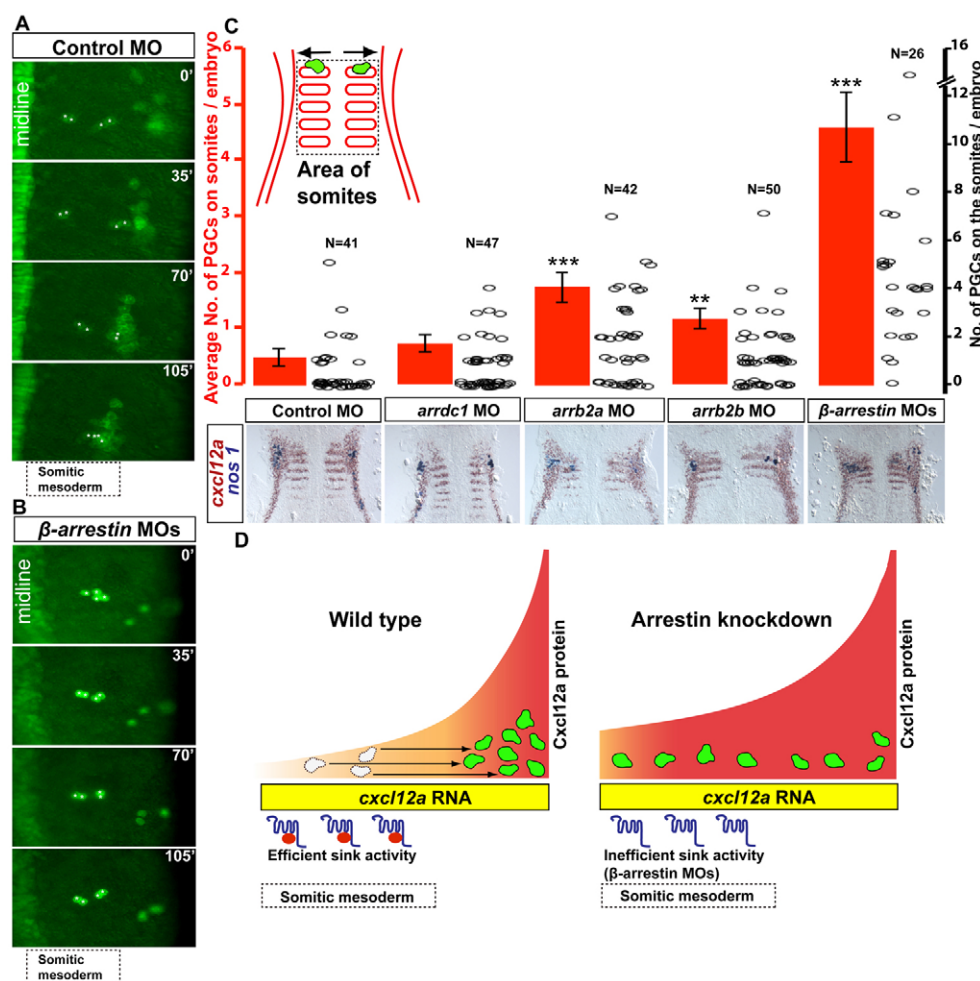

**Fig. 4. Role of β-arrestins in discrimination between Cxcl12a expression domains.** (A,B) Snapshots from supplementary material Movie 5 (A) and Fig. S6 (B). In early somitogenesis stages, PGCs (asterisks) specified close to the midline migrate laterally (A). In an embryo lacking β-arrestin function (B), this movement is not observed. (C) β-arrestins promote migration of PGCs away from the somites. Red bars (y-axis on left) indicate the average number of cells remaining in the somites; error bars indicate s.e.m. The distribution of the results is indicated by circles (y-axis on right); N, the number of embryos analyzed; \*\* $P < 0.05$ , \*\*\* $P < 0.001$ , Student's *t*-test. Bottom panels show examples of in situ hybridizations using *nanos1* (*nos1*; blue, PGCs) and *cxcl12a* (brown) probes used to generate the graphs. (D) A model for PGC migration during early somitogenesis in wild type (left) and in embryos compromised for β-arrestins (right). The sink function of Cxcr7b (purple), aided by β-arrestins (red ellipsoid), converts uniform *cxcl12a* mRNA expression into a chemotactic Cxcl12a gradient, directing the PGCs to the right. In the absence of β-arrestins, Cxcr7b function is compromised, increasing Cxcl12a levels in the forming somites and hindering the migration of PGCs towards their target.

reduced severity of the β-arrestin phenotype could result from β-arrestin-independent Cxcr7b function and from masking of the early phenotype by maternally provided β-arrestin.

Finally, it is noteworthy that β-arrestins are expressed in other regions of the zebrafish embryo, such as in the posterior lateral line and the axial vasculature (see [www.zfin.org](http://www.zfin.org)), that engage in chemokine-controlled cell migration (David et al., 2002; Siekmann et al., 2009). Additionally, β-arrestin- and CXCR7-dependent accumulation of CXCL12 is observed in human breast cancer cells grown in vitro (Luker et al., 2010). It would be interesting to investigate the role of β-arrestins in these other contexts.

#### Acknowledgements

We thank Ines Sandbott and Ursula Jordan for technical assistance and Michal Reichman for critical reading of the manuscript.

#### Funding

This work was supported by the Max-Planck Society (MPG), the German Research Foundation (DFG) and the European Research Council (ERC).

#### Competing interests statement

The authors declare no competing financial interests.

#### Supplementary material

Supplementary material available online at <http://dev.biologists.org/lookup/suppl/doi:10.1242/dev.080408/-/DC1>

#### References

- Balabanian, K., Lagane, B., Infantino, S., Chow, K. Y., Harriague, J., Moepps, B., Arenzana-Seisdedos, F., Thelen, M. and Bachelier, F. (2005). The chemokine SDF-1/CXCL12 binds to and signals through the orphan receptor RDC1 in T lymphocytes. *J. Biol. Chem.* **280**, 35760–35766.
- Benovic, J. L., Kühn, H., Weyand, I., Codina, J., Caron, M. G. and Lefkowitz, R. J. (1987). Functional desensitization of the isolated beta-adrenergic receptor by the beta-adrenergic receptor kinase: potential role of the retinal protein arrestin (48-kDa protein). *Proc. Natl. Acad. Sci. USA* **84**, 8879–8882.
- Blaser, H., Reichman-Fried, M., Castanon, I., Dumstrei, K., Marlow, F. L., Kawakami, K., Solnica-Krezel, L., Heisenberg, C. P. and Raz, E. (2006). Migration of zebrafish primordial germ cells: a role for myosin contraction and cytoplasmic flow. *Dev. Cell* **11**, 613–627.
- Boldajipour, B., Mahabaleswar, H., Kardash, E., Reichman-Fried, M., Blaser, H., Minina, S., Wilson, D., Xu, Q. and Raz, E. (2008). Control of chemokine-guided cell migration by ligand sequestration. *Cell* **132**, 463–473.

- Burns, J. M., Summers, B. C., Wang, Y., Melikian, A., Berahovich, R., Miao, Z., Penfold, M. E., Sunshine, M. J., Littman, D. R., Kuo, C. J. et al. (2006). A novel chemokine receptor for SDF-1 and I-TAC involved in cell survival, cell adhesion, and tumor development. *J. Exp. Med.* **203**, 2201-2213.
- Cruz-Orengo, L., Holman, D. W., Dorsey, D., Zhou, L., Zhang, P., Wright, M., McCandless, E. E., Patel, J. R., Luker, G. D., Littman, D. R. et al. (2011). CXCR7 influences leukocyte entry into the CNS parenchyma by controlling abluminal CXCL12 abundance during autoimmunity. *J. Exp. Med.* **208**, 327-339.
- David, N. B., Sapède, D., Saint-Etienne, L., Thisse, C., Thisse, B., Dambly-Chaudière, C., Rosa, F. M. and Ghysen, A. (2002). Molecular basis of cell migration in the fish lateral line: role of the chemokine receptor CXCR4 and of its ligand, SDF1. *Proc. Natl. Acad. Sci. USA* **99**, 16297-16302.
- Doitsidou, M., Reichman-Fried, M., Stebler, J., Köprunner, M., Dörries, J., Meyer, D., Esguerra, C. V., Leung, T. and Raz, E. (2002). Guidance of primordial germ cell migration by the chemokine SDF-1. *Cell* **111**, 647-659.
- Ferguson, S. S. G., Downey, W. E., 3rd, Colapietro, A.-M., Barak, L. S., Ménard, L. and Caron, M. G. (1996). Role of beta-arrestin in mediating agonist-promoted G protein-coupled receptor internalization. *Science* **271**, 363-366.
- Galliera, E., Jala, V. R., Trent, J. O., Bonecchi, R., Signorelli, P., Lefkowitz, R. J., Mantovani, A., Locati, M. and Haribabu, B. (2004). beta-Arrestin-dependent constitutive internalization of the human chemokine decoy receptor D6. *J. Biol. Chem.* **279**, 25590-25597.
- Goodman, O. B., Jr, Krupnick, J. G., Santini, F., Gurevich, V. V., Penn, R. B., Gagnon, A. W., Keen, J. H. and Benovic, J. L. (1996). Beta-arrestin acts as a clathrin adaptor in endocytosis of the beta2-adrenergic receptor. *Nature* **383**, 447-450.
- Gorvel, J. P., Chavrier, P., Zerial, M. and Gruenberg, J. (1991). rab5 controls early endosome fusion in vitro. *Cell* **64**, 915-925.
- Huotari, J. and Helenius, A. (2011). Endosome maturation. *EMBO J.* **30**, 3481-3500.
- Laporte, S. A., Oakley, R. H., Zhang, J., Holt, J. A., Ferguson, S. S., Caron, M. G. and Barak, L. S. (1999). The beta2-adrenergic receptor/betaarrestin complex recruits the clathrin adaptor AP-2 during endocytosis. *Proc. Natl. Acad. Sci. USA* **96**, 3712-3717.
- Laporte, S. A., Oakley, R. H., Holt, J. A., Barak, L. S. and Caron, M. G. (2000). The interaction of beta-arrestin with the AP-2 adaptor is required for the clustering of beta 2-adrenergic receptor into clathrin-coated pits. *J. Biol. Chem.* **275**, 23120-23126.
- Luker, K. E. G., Gupta, M., Steele, J. M., Foerster, B. R. and Luker, G. D. (2009). Imaging ligand-dependent activation of CXCR7. *Neoplasia* **11**, 1022-1035.
- Luker, K. E., Steele, J. M., Mihalko, L. A., Ray, P. and Luker, G. D. (2010). Constitutive and chemokine-dependent internalization and recycling of CXCR7 in breast cancer cells to degrade chemokine ligands. *Oncogene* **29**, 4599-4610.
- Luker, K. E., Lewin, S. A., Mihalko, L. A., Schmidt, B. T., Winkler, J. S., Coggins, N. L., Thomas, D. G. and Luker, G. D. (2012). Scavenging of CXCL12 by CXCR7 promotes tumor growth and metastasis of CXCR4-positive breast cancer cells. *Oncogene* doi: 10.1038/onc.2011.633.
- Mantovani, A., Bonecchi, R. and Locati, M. (2006). Tuning inflammation and immunity by chemokine sequestration: decoys and more. *Nat. Rev. Immunol.* **6**, 907-918.
- Méresse, S., Gorvel, J. P. and Chavrier, P. (1995). The rab7 GTPase resides on a vesicular compartment connected to lysosomes. *J. Cell Sci.* **108**, 3349-3358.
- Miao, Z., Luker, K. E., Summers, B. C., Berahovich, R., Bhojani, M. S., Rehemtulla, A., Kleer, C. G., Essner, J. J., Nasevicius, A., Luker, G. D. et al. (2007). CXCR7 (RDC1) promotes breast and lung tumor growth in vivo and is expressed on tumor-associated vasculature. *Proc. Natl. Acad. Sci. USA* **104**, 15735-15740.
- Minina, S., Reichman-Fried, M. and Raz, E. (2007). Control of receptor internalization, signaling level, and precise arrival at the target in guided cell migration. *Curr. Biol.* **17**, 1164-1172.
- Moreira, S., Stramer, B., Evans, I., Wood, W. and Martin, P. (2010). Prioritization of competing damage and developmental signals by migrating macrophages in the Drosophila embryo. *Curr. Biol.* **20**, 464-470.
- Naumann, U., Cameroni, E., Pruenster, M., Mahabaleshwar, H., Raz, E., Zerwes, H. G., Rot, A. and Thelen, M. (2010). CXCR7 functions as a scavenger for CXCL12 and CXCL11. *PLoS ONE* **5**, e9175.
- Nguyen, A. W. and Daugherty, P. S. (2005). Evolutionary optimization of fluorescent proteins for intracellular FRET. *Nat. Biotechnol.* **23**, 355-360.
- Nowak, M., Machate, A., Yu, S. R., Gupta, M. and Brand, M. (2011). Interpretation of the FGF8 morphogen gradient is regulated by endocytic trafficking. *Nat. Cell Biol.* **13**, 153-158.
- Rajagopal, S., Kim, J., Ahn, S., Craig, S., Lam, C. M., Gerard, N. P., Gerard, C. and Lefkowitz, R. J. (2010). Beta-arrestin- but not G protein-mediated signaling by the "decoy" receptor CXCR7. *Proc. Natl. Acad. Sci. USA* **107**, 628-632.
- Ray, P., Mihalko, L. A., Coggins, N. L., Moudgil, P., Ehrlich, A., Luker, K. E. and Luker, G. D. (2012). Carboxy-terminus of CXCR7 regulates receptor localization and function. *Int. J. Biochem. Cell Biol.* **44**, 669-678.
- Rohrer, J., Schweizer, A., Russell, D. and Kornfeld, S. (1996). The targeting of Lamp1 to lysosomes is dependent on the spacing of its cytoplasmic tail tyrosine sorting motif relative to the membrane. *J. Cell Biol.* **132**, 565-576.
- Sánchez-Alcañiz, J. A., Haege, S., Mueller, W., Pla, R., Mackay, F., Schulz, S., López-Bendito, G., Stumm, R. and Marín, O. (2011). Cxcr7 controls neuronal migration by regulating chemokine responsiveness. *Neuron* **69**, 77-90.
- Siekman, A. F., Standley, C., Fogarty, K. E., Wolfe, S. A. and Lawson, N. D. (2009). Chemokine signaling guides regional patterning of the first embryonic artery. *Genes Dev.* **23**, 2272-2277.
- Sierro, F., Biben, C., Martínez-Muñoz, L., Mellado, M., Ransohoff, R. M., Li, M., Woehl, B., Leung, H., Groom, J., Batten, M. et al. (2007). Disrupted cardiac development but normal hematopoiesis in mice deficient in the second CXCL12/SDF-1 receptor, CXCR7. *Proc. Natl. Acad. Sci. USA* **104**, 14759-14764.
- Ullrich, O., Reinsch, S., Urbé, S., Zerial, M. and Parton, R. G. (1996). Rab11 regulates recycling through the pericentriolar recycling endosome. *J. Cell Biol.* **135**, 913-924.
- Wang, Y., Li, G., Stanco, A., Long, J. E., Crawford, D., Potter, G. B., Pleasure, S. J., Behrens, T. and Rubenstein, J. L. (2011). CXCR4 and CXCR7 have distinct functions in regulating interneuron migration. *Neuron* **69**, 61-76.
- Weber, M., Blair, E., Simpson, C. V., O'Hara, M., Blackburn, P. E., Rot, A., Graham, G. J. and Nibbs, R. J. (2004). The chemokine receptor D6 constitutively traffics to and from the cell surface to internalize and degrade chemokines. *Mol. Biol. Cell* **15**, 2492-2508.
- Weidinger, G., Wolke, U., Köprunner, M., Klinger, M. and Raz, E. (1999). Identification of tissues and patterning events required for distinct steps in early migration of zebrafish primordial germ cells. *Development* **126**, 5295-5307.
